# Supplementary material for: Assessment of the Genetic Structure and Diversity of Soybean (Glycine max L.) Germplasm Using Diversity Array Technology and Single Nucleotide Polymorphism Markers
Source: MDPI journal article supplement (doi:10.3390/plants11010068), 2021-12-26
Supplement: s1 [file s1]

Table S1: Quality parameter of the DArT-SNP markers

| Parameter       | SNP     |         |         |  | DArT    |         |         |
|-----------------|---------|---------|---------|--|---------|---------|---------|
|                 | Minimum | Maximum | Average |  | Minimum | Maximum | Average |
| MAF             | 0.05    | 0.50    | 0.14    |  | 0.05    | 0.50    | 0.30    |
| Reproducibility | 0.95    | 1.00    | 0.99    |  | 0.95    | 1.00    | 0.94    |
| Call rate       | 0.89    | 1.00    | 0.97    |  | 0.89    | 1.00    | 0.99    |
|                 |         |         |         |  |         |         |         |

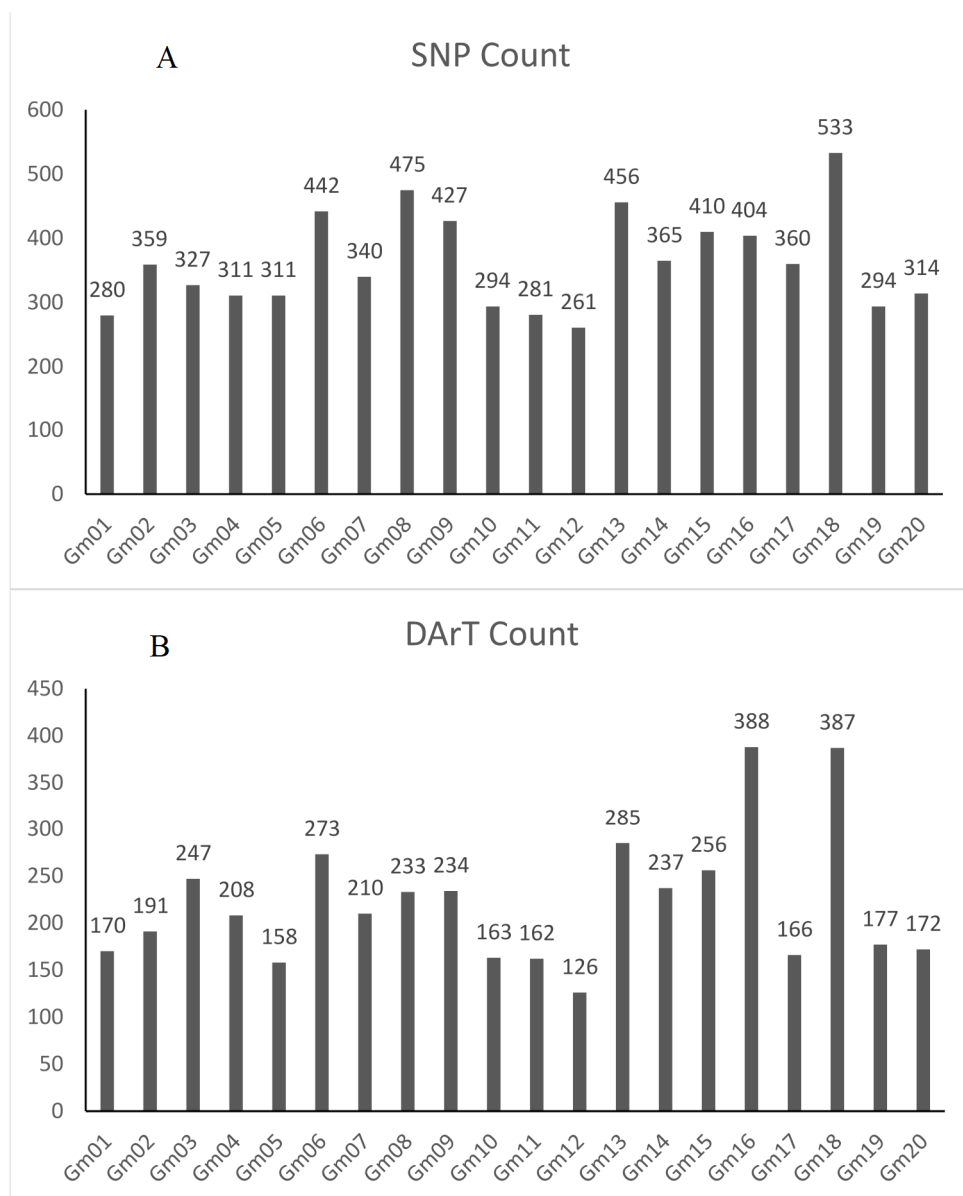

**Figure S1.** Distribution of SNPs across the 20 chromosomes of soybean. (a) SNP markers and (b) DArT markers.

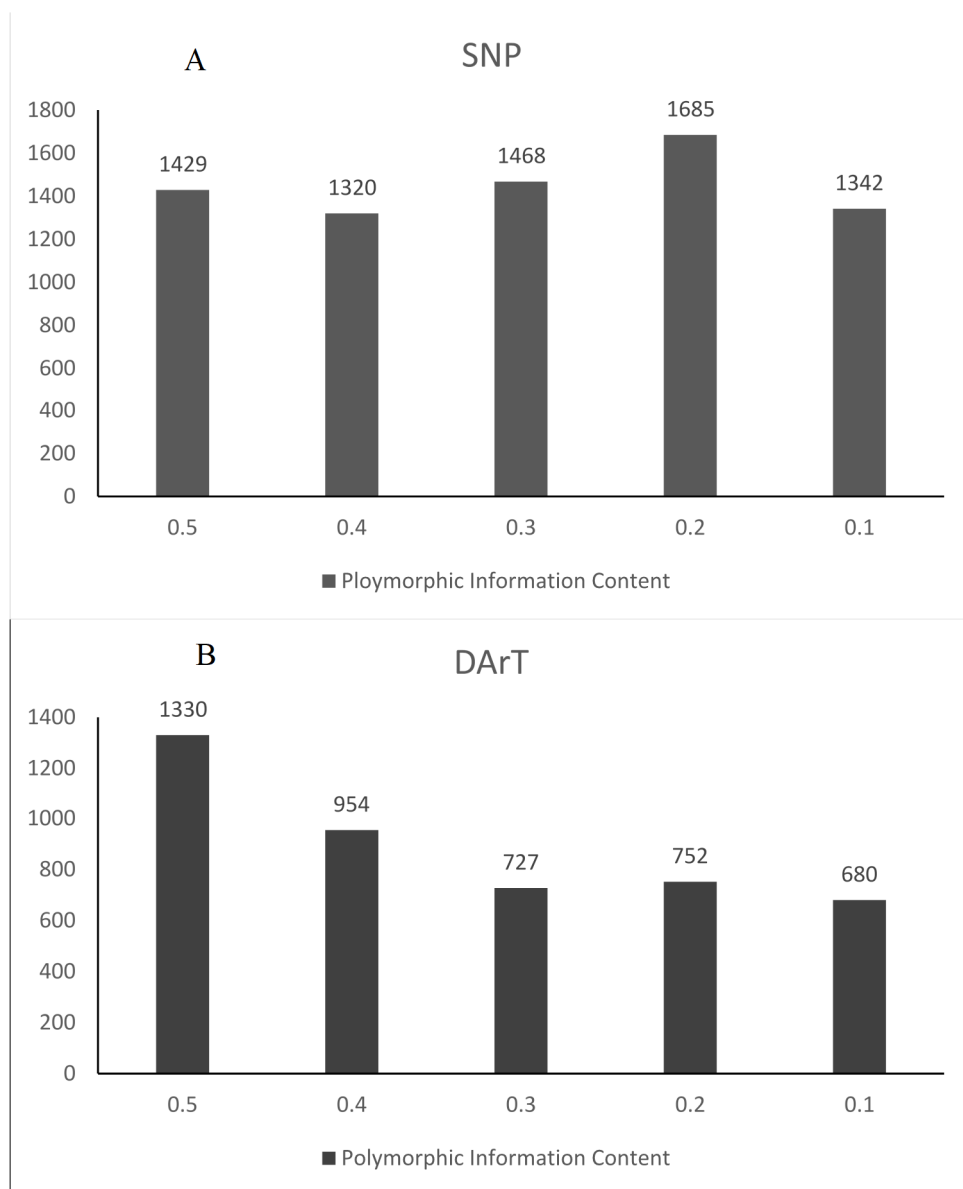

**Figure S2.** The polymorphic information content of markers. (a) SNP markers and (b) DArT markers.

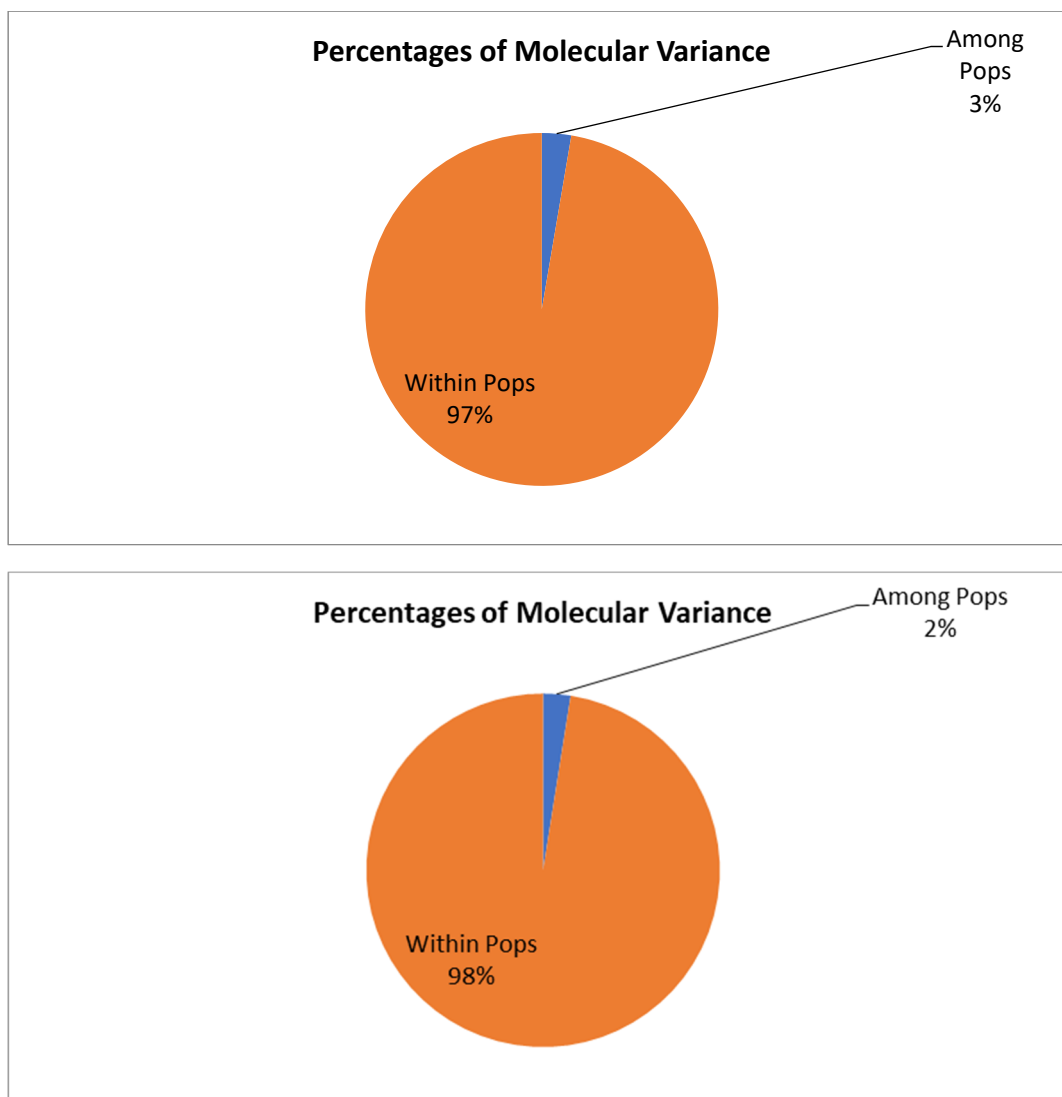

Figure S3: Percentages of molecular variance within and among populations. (a) SNP markers (b) DArT markers

Table S2: Allelic patterns across the populations for SNP and DArT markers

| Population | Number of alleles (Na) | Number of effective alleles (Ne) | Shannon's diversity index (I) | Diversity (h) | Unbiased diversity (uh) |
|------------|------------------------|----------------------------------|-------------------------------|---------------|-------------------------|
|            | <b>SNP</b>             |                                  |                               |               |                         |
| 1          | 0.93                   | 1.33                             | 0.26                          | 0.18          | 0.27                    |
| 2          | 1.30                   | 1.45                             | 0.38                          | 0.26          | 0.35                    |
| 3          | 1.05                   | 1.35                             | 0.28                          | 0.19          | 0.29                    |
| 4          | 0.63                   | 1.19                             | 0.13                          | 0.09          | 0.19                    |
| 5          | 1.98                   | 1.59                             | 0.52                          | 0.34          | 0.35                    |
| 6          | 1.89                   | 1.54                             | 0.48                          | 0.32          | 0.33                    |
| 7          | 0.73                   | 1.21                             | 0.15                          | 0.11          | 0.21                    |
| 8          | 1.86                   | 1.54                             | 0.48                          | 0.32          | 0.33                    |
| 9          | 0.84                   | 1.32                             | 0.22                          | 0.16          | 0.32                    |
| 10         | 1.93                   | 1.56                             | 0.49                          | 0.33          | 0.34                    |
| 11         | 1.29                   | 1.44                             | 0.36                          | 0.25          | 0.33                    |
| 12         | 1.29                   | 1.44                             | 0.36                          | 0.25          | 0.33                    |
| 13         | 1.99                   | 1.58                             | 0.52                          | 0.34          | 0.35                    |
| 14         | 1.52                   | 1.50                             | 0.43                          | 0.29          | 0.35                    |
|            |                        |                                  |                               |               |                         |
|            | <b>DArT</b>            |                                  |                               |               |                         |
| 1          | 1.65                   | 1.55                             | 0.40                          | 0.27          | 0.41                    |
| 2          | 1.77                   | 1.58                             | 0.44                          | 0.29          | 0.38                    |
| 3          | 1.62                   | 1.53                             | 0.37                          | 0.25          | 0.38                    |
| 4          | 1.37                   | 1.37                             | 0.25                          | 0.18          | 0.37                    |
| 5          | 2.77                   | 1.69                             | 0.62                          | 0.37          | 0.38                    |
| 6          | 2.56                   | 1.65                             | 0.59                          | 0.35          | 0.36                    |
| 7          | 1.42                   | 1.42                             | 0.29                          | 0.21          | 0.42                    |
| 8          | 2.41                   | 1.60                             | 0.55                          | 0.33          | 0.35                    |
| 9          | 1.29                   | 1.29                             | 0.20                          | 0.14          | 0.29                    |
| 10         | 2.77                   | 1.71                             | 0.64                          | 0.37          | 0.38                    |
| 11         | 1.15                   | 1.10                             | 0.09                          | 0.06          | 0.08                    |
| 12         | 1.84                   | 1.64                             | 0.47                          | 0.30          | 0.41                    |
| 13         | 2.93                   | 1.69                             | 0.64                          | 0.37          | 0.37                    |
| 14         | 1.96                   | 1.61                             | 0.50                          | 0.32          | 0.38                    |
